# Supplementary material
Source: publisher figshare collection journal article supplement (https://acs.figshare.com/ndownloader/files/8953522)
Supplement: Supplementary file 1 [file 8953522]

# Oxalic Acid Modification of $\beta$ Zeolite for Dehydration of 2-(4'-Ethylbenzoyl) Benzoic Acid

*Min Liu<sup>a,\*</sup>, Yanxin Yin<sup>a</sup>, Xinwen Guo<sup>a</sup>, Chunshan Song<sup>a,b</sup>*

a. State Key Laboratory of Fine Chemicals, PSU-DUT Joint Center for Energy Research, School of Chemical Engineering, Dalian University of Technology, Dalian 116024, P. R. China.

b. EMS Energy Institute, PSU-DUT Joint Center for Energy Research and Department of Energy & Mineral Engineering, Pennsylvania State University, University Park, Pennsylvania 16802, USA.

Corresponding Author: Min Liu, email: [lium@dlut.edu.cn](mailto:lium@dlut.edu.cn)

**Table S1.** Distribution of various Al species in H $\beta$  samples.

| Sample             | Al octahedral (%) | Al pentahedral(%) | Al tetrahedral (%) |
|--------------------|-------------------|-------------------|--------------------|
| P-H $\beta$        | 17.8              | 47.2              | 35.0               |
| OT(0.02)-H $\beta$ | 17.8              | 49.4              | 32.8               |
| OT(0.06)-H $\beta$ | 15.6              | 47.6              | 36.8               |
| OT(0.10)-H $\beta$ | 14.6              | 49.3              | 36.1               |
| OT(0.14)-H $\beta$ | 10.5              | 60.2              | 29.3               |
